# Supplementary material
Source: PubMed Central journal article supplement (PMC6086742)
Supplement: NIHMS944194-supplement-SupFIg.pdf [file NIHMS944194-supplement-SupFIg.pdf]

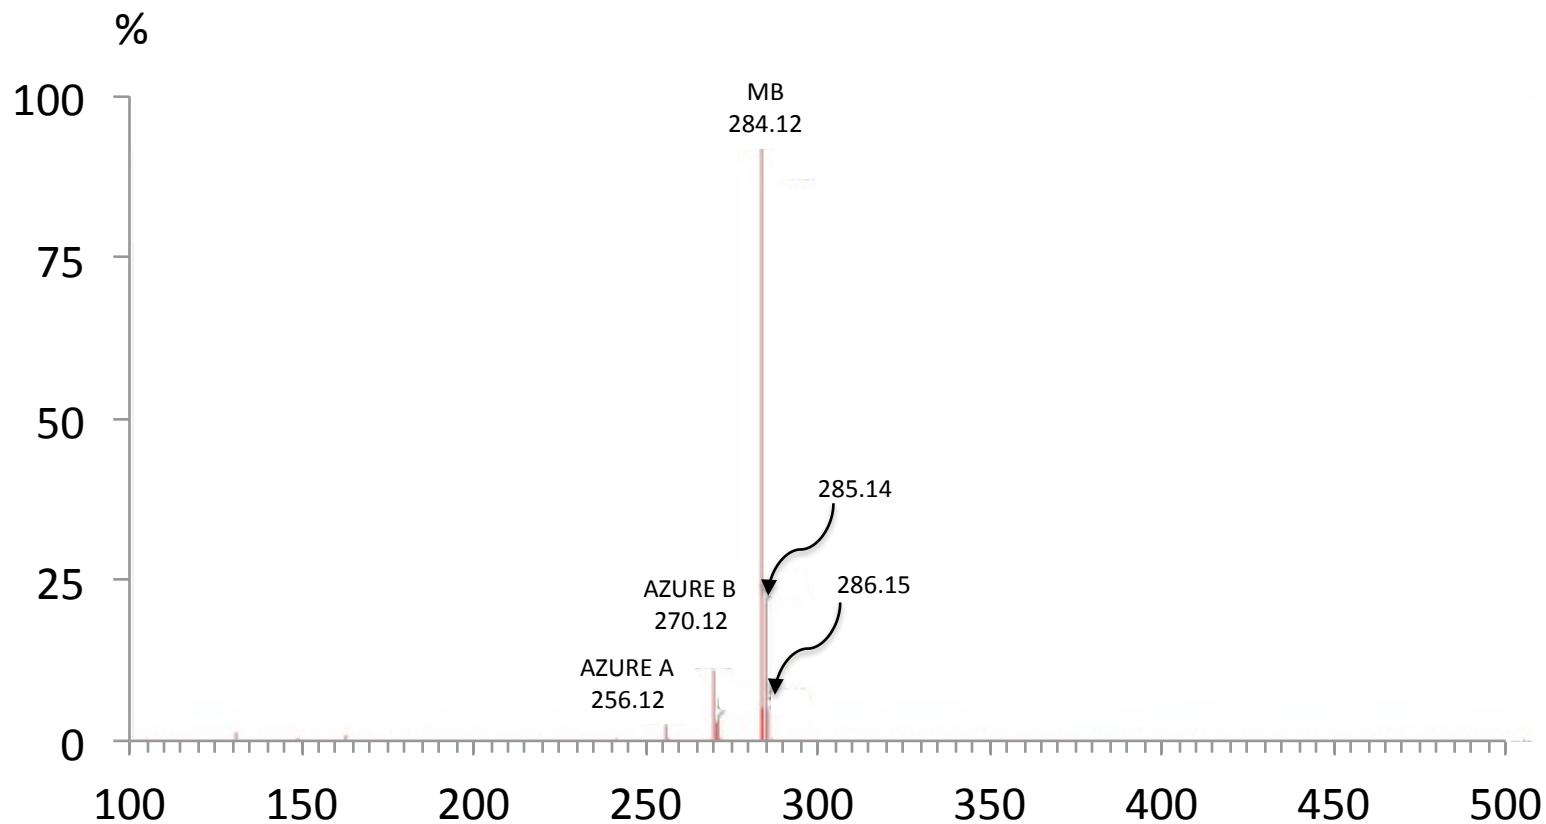

**Supplemental Figure 1.** Mass spectrometric analysis of the solution of methylene blue used in our experiments performed on a Waters Q-TOF Premier quadrupole/time-of-flight (TOF) mass spectrometer (Waters Corporation ( $\mu$ Mass Ltd)). The commercial solution of dye that we used appears to be reasonably pure, containing a negligible amount of Azure B and Azure A, two demethylated forms of MB.
